# Supplementary material
Source: publisher figshare collection journal article supplement (https://frontiersin.figshare.com/ndownloader/files/17462033)
Supplement: Supplementary file [file 17462033]

## Supplemental Figure

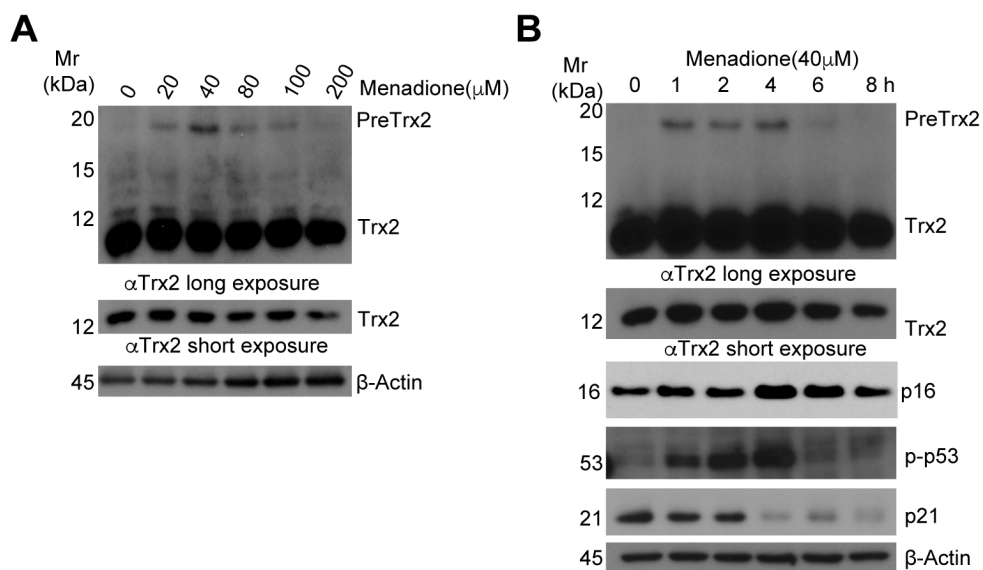

**Supplemental Figure 1: Senescence stimuli impair Trx2 processing. (A)** Effects of different doses of menadione on Trx2 processing. HUVECs were incubated with different doses of menadione as indicated. Trx2 protein was determined. **B.** Kinetics of menadione on Trx2 processing and senescence. HUVECs were incubated with menadione at 40  $\mu$ M for indicated time. Trx2 protein and senescence markers (p16, p-p53, and p21) were determined by Western blotting with specific antibodies (C).
